# Supplementary material for: Structural basis of homo- and heterotrimerization of collagen I
Source: PubMed Central journal article supplement (PMC5353611; doi:10.1038/ncomms14671), 2017-03-10
Supplement: ncomms14671-s1.pdf [file ncomms14671-s1.pdf]

**Supplementary Table 1. Details of interactions at the inter-chain interfaces in the crystal structures of homo-CPI and CPIII.**

| Homo-CPI                            |           |                      |                                     |           |                      |                                     |           |                      |
|-------------------------------------|-----------|----------------------|-------------------------------------|-----------|----------------------|-------------------------------------|-----------|----------------------|
| INTERFACE 1 (503.6 Å <sup>2</sup> ) |           |                      | INTERFACE 2 (538.4 Å <sup>2</sup> ) |           |                      | INTERFACE 3 (520.0 Å <sup>2</sup> ) |           |                      |
| Chain B                             | Dist. [Å] | Chain C              | Chain F                             | Dist. [Å] | Chain B              | Chain C                             | Dist. [Å] | Chain F              |
| <b>S-S bonds</b>                    |           |                      |                                     |           |                      |                                     |           |                      |
| <b>CYS 47 [SG]</b>                  | 2.05      | <b>CYS 64 [SG]</b>   | <b>CYS 47 [SG]</b>                  | 2.09      | <b>CYS 64 [SG]</b>   | <b>CYS 47 [SG]</b>                  | 2.08      | <b>CYS 64 [SG]</b>   |
| <b>H bonds</b>                      |           |                      |                                     |           |                      |                                     |           |                      |
| <b>ARG 39 [NH1]</b>                 | 3.33      | <b>ASN 61 [O]</b>    | <b>ARG 39 [NH1]</b>                 | 2.68      | <b>ASN 61 [O]</b>    | <b>ARG 39 [NH1]</b>                 | 2.93      | <b>ASN 61 [O]</b>    |
| <b>ARG 39 [NH1]</b>                 | 3.35      | <b>GLN 62 [OE1]</b>  | <b>ASP 43 [OD1]</b>                 | 2.90      | <b>CYS 64 [N]</b>    | <b>ARG 39 [NH1]</b>                 | 3.62      | <b>GLN 62 [OE1]</b>  |
| <b>ASP 43 [OD1]</b>                 | 2.83      | <b>CYS 64 [N]</b>    | <b>GLN 62 [NE2]</b>                 | 3.00      | <b>GLN 62 [OE1]</b>  | <b>ASP 43 [OD1]</b>                 | 2.94      | <b>CYS 64 [N]</b>    |
| <b>MET 46 [SD]</b>                  | 3.64      | <b>ASP 67 [N]</b>    |                                     |           |                      | <b>MET 46 [SD]</b>                  | 3.64      | <b>ASP 67 [N]</b>    |
|                                     |           |                      |                                     |           |                      | <b>GLN 62 [NE2]</b>                 | 3.30      | <b>GLN 62 [OE1]</b>  |
| <b>Salt bridges</b>                 |           |                      |                                     |           |                      |                                     |           |                      |
| <b>ARG 42 [NH1]</b>                 | 3.25      | <b>ASP 67 [OD2]</b>  | <b>ARG 42 [NH1]</b>                 | 3.34      | <b>ASP 67 [OD2]</b>  | <b>ARG 42 [NH1]</b>                 | 3.17      | <b>ASP 67 [OD2]</b>  |
| <b>ARG 42 [NH1]</b>                 | 2.85      | <b>ASP 129 [OD1]</b> | <b>ARG 42 [NH2]</b>                 | 2.85      | <b>ASP 67 [OD2]</b>  | <b>ARG 42 [NH2]</b>                 | 2.94      | <b>ASP 67 [OD2]</b>  |
| <b>ARG 42 [NH2]</b>                 | 3.25      | <b>ASP 67 [OD2]</b>  | <b>ARG 42 [NE]</b>                  | 3.95      | <b>ASP 129 [OD1]</b> | <b>ARG 42 [NH1]</b>                 | 2.67      | <b>ASP 129 [OD1]</b> |
|                                     |           |                      | <b>ARG 42 [NH2]</b>                 | 2.86      | <b>ASP 129 [OD1]</b> |                                     |           |                      |

  

| CPIII                               |           |                      |                                     |           |                      |                                     |           |                      |
|-------------------------------------|-----------|----------------------|-------------------------------------|-----------|----------------------|-------------------------------------|-----------|----------------------|
| INTERFACE 1 (740.3 Å <sup>2</sup> ) |           |                      | INTERFACE 2 (652.5 Å <sup>2</sup> ) |           |                      | INTERFACE 3 (514.9 Å <sup>2</sup> ) |           |                      |
| Chain A                             | Dist. [Å] | Chain B              | Chain B                             | Dist. [Å] | Chain C              | Chain C                             | Dist. [Å] | Chain A              |
| <b>S-S bonds</b>                    |           |                      |                                     |           |                      |                                     |           |                      |
| <b>CYS 47 [SG]</b>                  | 2.03      | <b>CYS 64 [SG]</b>   | <b>CYS 47 [SG]</b>                  | 2.04      | <b>CYS 64 [SG]</b>   | <b>CYS 47 [SG]</b>                  | 2.04      | <b>CYS 64 [SG]</b>   |
| <b>H bonds</b>                      |           |                      |                                     |           |                      |                                     |           |                      |
| <b>ASP 43 [OD2]</b>                 | 3.30      | <b>CYS 64 [N]</b>    | <b>ASP 43 [OD2]</b>                 | 3.16      | <b>CYS 64 [N]</b>    | <b>ARG 39 [NH1]</b>                 | 2.83      | <b>ASN 61 [O]</b>    |
| <b>SER 141 [OG]</b>                 | 2.91      | <b>ASP 130 [OD2]</b> | <b>SER 141 [OG]</b>                 | 3.15      | <b>ASP 130 [OD2]</b> | <b>ASP 43 [OD2]</b>                 | 3.01      | <b>CYS 64 [N]</b>    |
| <b>LYS 214 [NZ]</b>                 | 2.93      | <b>SER 174 [O]</b>   |                                     |           |                      | <b>SER 141 [OG]</b>                 | 3.16      | <b>ASP 127 [O]</b>   |
|                                     |           |                      |                                     |           |                      | <b>SER 141 [OG]</b>                 | 3.20      | <b>ASP 130 [OD2]</b> |
| <b>Salt bridges</b>                 |           |                      |                                     |           |                      |                                     |           |                      |
| <b>ARG 42 [NE]</b>                  | 2.93      | <b>ASP 127 [OD2]</b> | <b>ARG 42 [NE]</b>                  | 2.96      | <b>ASP 127 [OD2]</b> | <b>ARG 142 [NH1]</b>                | 3.85      | <b>ASP 127 [OD1]</b> |
| <b>ARG 142 [NH2]</b>                | 3.31      | <b>GLU 126 [OE2]</b> | <b>ARG 213 [NH2]</b>                | 3.51      | <b>ASP 130 [OD2]</b> | <b>ARG 142 [NH1]</b>                | 3.00      | <b>ASP 127 [OD2]</b> |
| <b>ARG 142 [NH2]</b>                | 4.00      | <b>ASP 130 [OD2]</b> |                                     |           |                      |                                     |           |                      |
| <b>LYS 186 [NZ]</b>                 | 3.06      | <b>GLU 176 [OE1]</b> |                                     |           |                      |                                     |           |                      |
| <b>ARG 217 [NH2]</b>                | 3.36      | <b>GLU 176 [OE1]</b> |                                     |           |                      |                                     |           |                      |
| <b>ARG 217 [NH2]</b>                | 3.28      | <b>GLU 176 [OE2]</b> |                                     |           |                      |                                     |           |                      |

Conserved/homologous residues in the base region are highlighted in red, with conserved/homologous residues in the petal region highlighted in blue. Residues in the petal region that are specific to each procollagen type are highlighted in purple. There are no such specific residues in the base region for either homo-CPI or CPIII. The interfaces for homo-CPI do not include the coiled-coil region as this was absent from the structure used to calculate the interfaces for CPIII (PDB code 4AE2). Data for only one of the two trimers in the asymmetric unit are shown for homo-CPI, interactions for the second trimer being very similar. Individual chains in homo-CPI were automatically identified as B, C and F during structure determination, with A, D and E being used for the other trimer in the asymmetric unit.

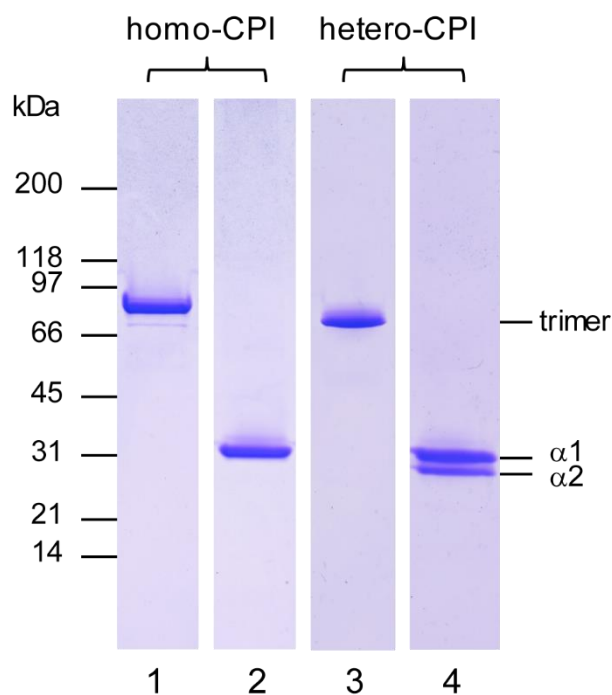

**Supplementary Figure 1. Purification of recombinant forms of homo-CPI and hetero-CPI.** Samples from the final gel filtration step are shown. Track 1: homo-CPI, non-reducing conditions; track 2: homo-CPI, reducing conditions; track 3: hetero-CPI, non-reducing conditions; track 4: hetero-CPI, reducing conditions. SDS-PAGE (4-20 % acrylamide gradient gels), staining with Coomassie Blue. For hetero-CPI, the N-terminal His-tag on the  $\alpha 2(I)$  chain has been removed by cleavage with TEV protease. Data shown are representative of triplicate (A) biological replicates.

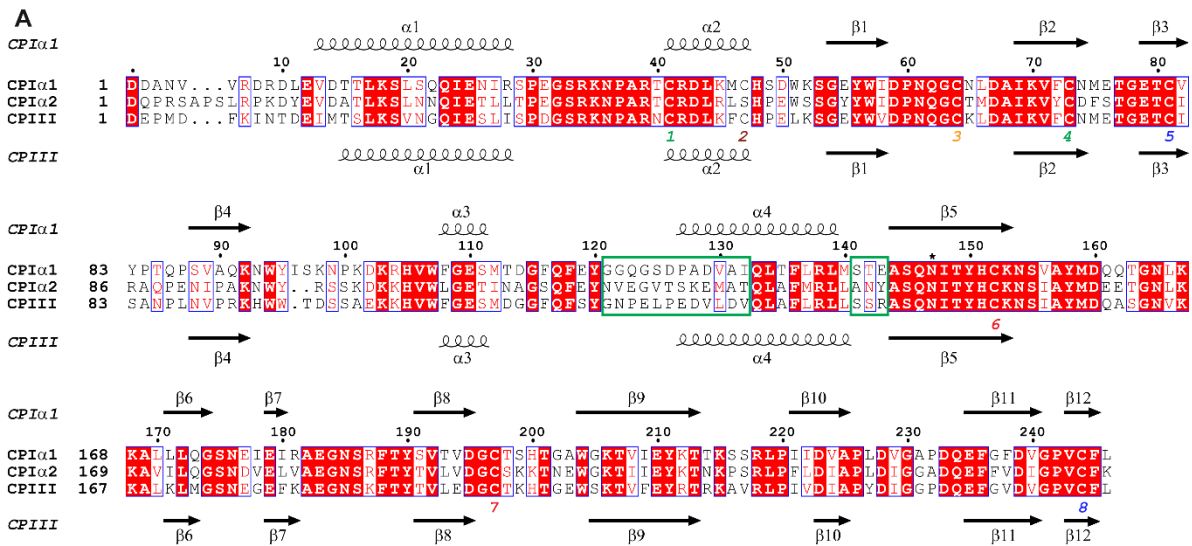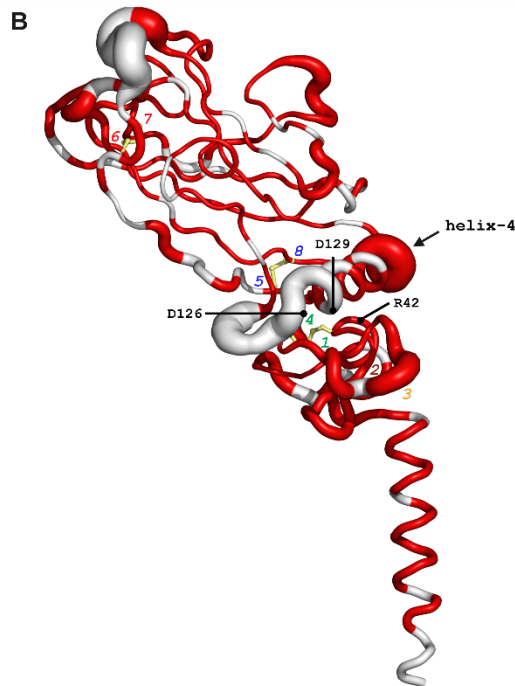

**Supplementary Figure 2. Sequence and structural alignments of CPI and CPIII.** (A) Sequence alignments, performed using *ESPrpt*, with corresponding secondary structures based on the crystal structures of homo-CPI and CPIII. Identical residues are indicated by white labels on a red background, conservative changes by red on white and non-conserved changes by black on white. Blue boxes indicate identical/conserved regions. Numbering, based on the CPI  $\alpha$ 1 chain, begins after the BMP-1 cleavage site; there are differences in residue numbering, due to insertions and deletions, for CPI $\alpha$ 2 and CPIII. The long and short stretches of the CRS are outlined in green. In the constructs used here, the Asn residue in the N-glycosylation site (indicated by \*) was mutated to Gln. Cysteine residues involved in intra-chain disulphide bonds (1-4, 5-8, 6-7) are numbered as pairs with the same colour, while those involved in inter-chain disulphide bonds (2, 3) are in different colours. (B) Structural alignment between one chain from homo-CPI and one chain from CPIII (PDB code 4AK3), obtained using *ENDscript*. Sequence similarity is indicated by the colour, where red indicates identical residues and grey non-identical. The width of the ribbon is proportional to the spatial separation between corresponding residues in the aligned structures. Positions of cysteine residues are indicated (same colour code as in A), as well as helix 4 and positions of key residues in CPI $\alpha$ 1 (R42, D126, D129). Note that in this orientation R42 is at the back with D126 and D129 at the front.

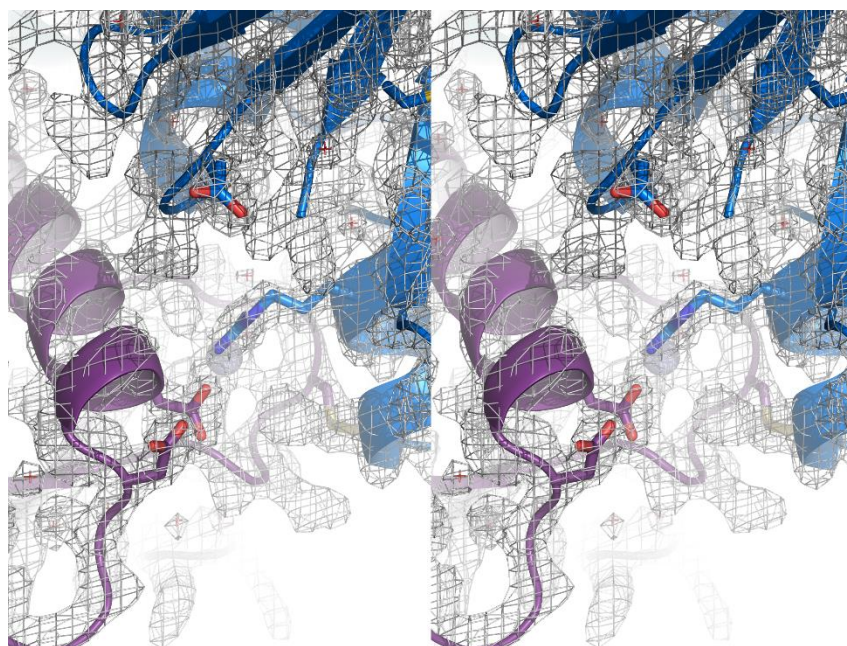

**Supplementary Figure 3. Portion of the electron density map.** Stereo drawing showing the 2Fo-Fc electron density contoured at  $1.6\sigma$  around charged residues at the inter-chain interface in homo-CPI. Colouring as in Fig. 3B.

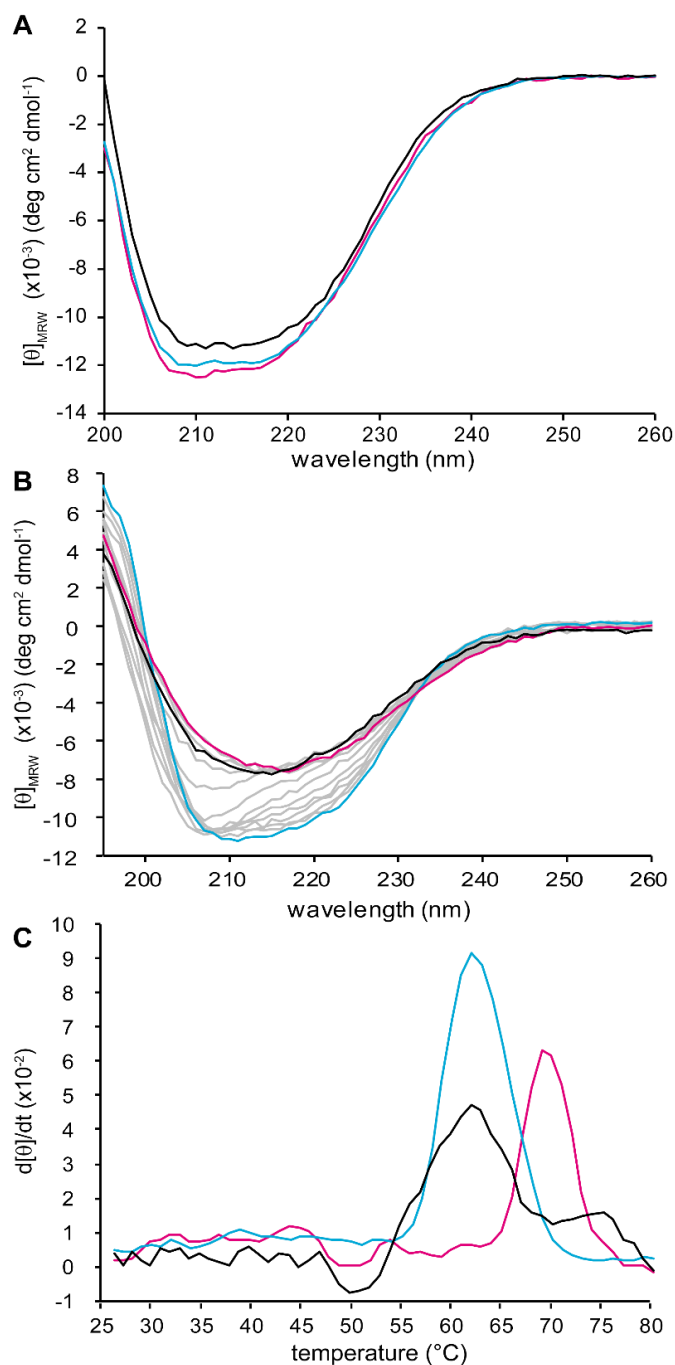

**Supplementary Figure 4. Circular dichroism analysis of C-propeptide trimers.** (A) Far UV spectra for His-tagged CPIII (black), His-tagged homo-CPI (magenta) and non-tagged hetero-CPI (turquoise), measured at 25 °C. The curves show mean residue molar ellipticities (MRME) in the wavelength range 200 nm to 260 nm. (B) Far UV spectra for CPIII measured in the temperature range 25 °C (turquoise) to 85 °C (magenta), in steps of 5 °C, and after cooling to 25 °C (black). The curves show MRME values at each temperature in the wavelength range 195 nm to 260 nm, with data for intermediate temperatures in grey. (C) Temperature dependence of the MRME data for CPIII (black), His-tagged homo-CPI (magenta) and non-tagged hetero-CPI (turquoise) measured at 208 nm in the range 25 °C to 80 °C. The curves show the first derivative of the MRME versus temperature curves (where the peaks correspond to the mid-points in the thermal transitions). MRW = mean residue weight. Data shown are representative of triplicate technical replicates.

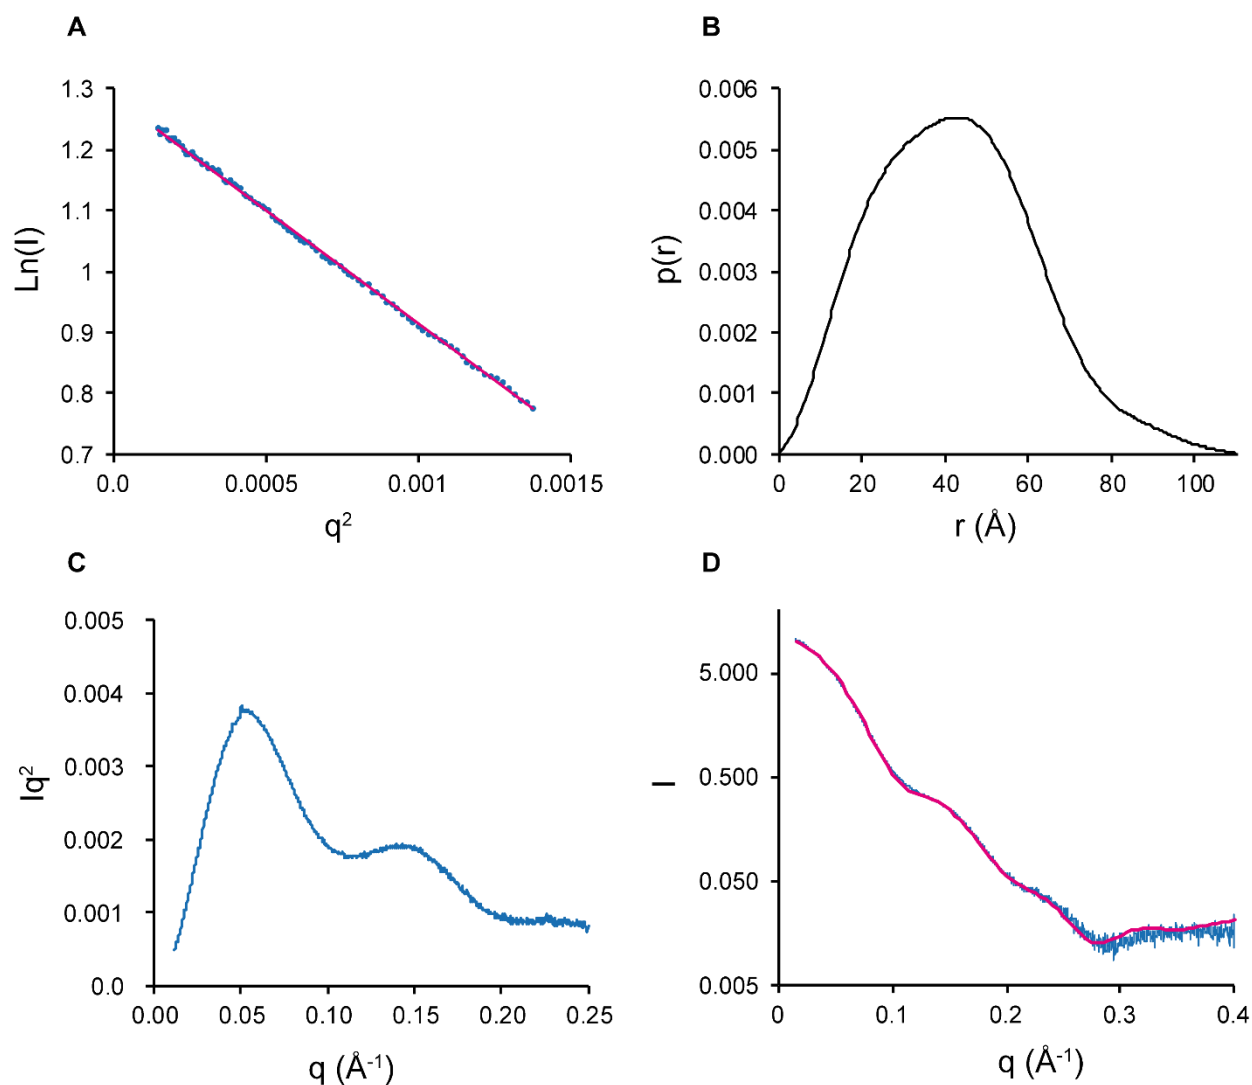

**Supplementary Figure 5. Small angle X-ray scattering of hetero-CPI.** (A) Linear Guinier plot corresponding to a radius of gyration of 33.4 Å. Experimental data in blue. (B) Distance distribution function  $p(r)$  showing a maximum dimension of approximately 110 Å. (C) Kratky curve calculated from the scattering data indicating a well-folded multidomain protein. (D) Comparison of the observed angular dependence of the SAXS data for His-tagged hetero-CPI (in blue) with the theoretical curve (in magenta) calculated using WAXSiS based on the crystal structure of homo-CPI.

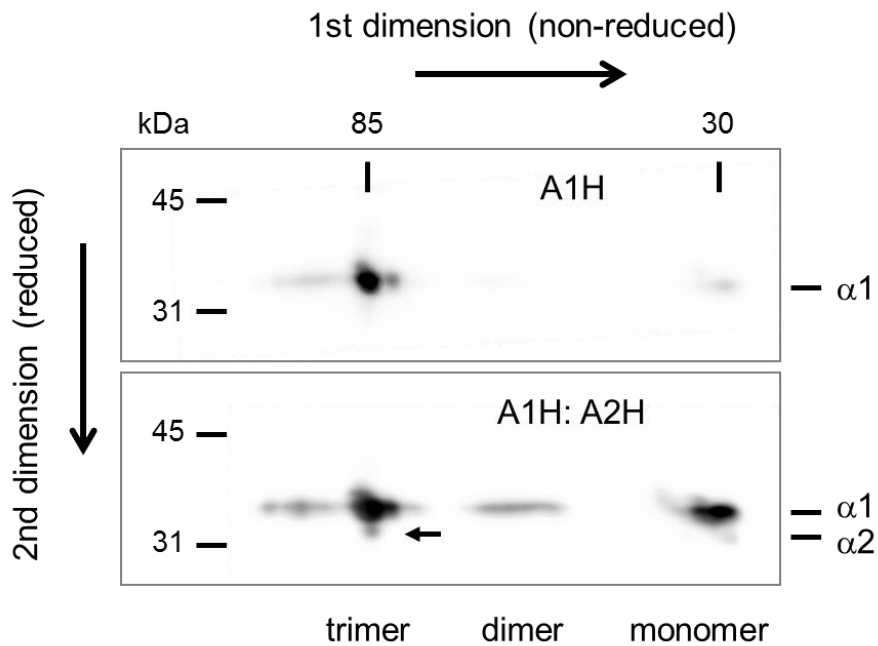

**Supplementary Figure 6. Composition of trimers analysed by two-dimensional SDS-PAGE and Western blotting.** Since non-reducing gels of conditioned medium sometimes showed the presence of monomers (and other forms) in addition to the trimers migrating at  $\sim 85$  kDa, gels (10 % acrylamide) were run first in non-reducing conditions then individual tracks were cut out, reduced and alkylated, placed horizontally on a second gel (one for each track) and run in a second dimension (reducing conditions) followed by Western blotting using anti-His tag antibodies. Unlike the homo-CPI trimer (A1H), which migrates as a single band in reducing conditions, the hetero-CPI trimer (A1H:A2H) is resolved into two bands, corresponding to the  $\alpha 1$  and  $\alpha 2$  chains, the latter indicated by an arrow. Since the  $\alpha 1$ : $\alpha 2$  ratio is clearly much greater than 2:1, this shows that the band migrating at 85 kDa consists of both homotrimers and heterotrimers. Data shown are representative of triplicate biological replicates.

|                              |     | 10           | 20     | 30      | 40      | 50      | 60     | 70              | 80       |        |       |        |                    |    |          |       |          |   |  |
|------------------------------|-----|--------------|--------|---------|---------|---------|--------|-----------------|----------|--------|-------|--------|--------------------|----|----------|-------|----------|---|--|
| P02452_CO1A1_HUMAN_1228-1464 | *10 | DLEVD        | TTLKSL | SQQIEN  | IRSP    | EG-SRKN | PART   | <b>CRDL</b> KM  | CHSDW    | ----KS | GEYWI | DPNQ   | <b>CNLD</b> AIKVF  | CN | MET-GET  | CVYPT | 85       |   |  |
| P08123_CO1A2_HUMAN_1132-1366 | *13 | DYEVD        | ATLKSL | NNQIET  | LLTPEG  | -SRKN   | PART   | <b>CRDL</b> RL  | SHPEW    | ----SS | GYWI  | DPNQ   | <b>CTMD</b> AIKVY  | CD | FST-GET  | CIRAQ | 88       |   |  |
| P02458_CO2A1_HUMAN_1252-1487 | *11 | DAEVD        | ATLKSL | NNQIES  | IRSP    | EG-SRKN | PART   | <b>CRDL</b> KL  | CHPEW    | ----KS | GDYWI | DPNQ   | <b>CTLD</b> AMKVF  | CN | MET-GET  | CVYPN | 86       |   |  |
| P02461_CO3A1_HUMAN_1231-1466 | *10 | TDEIM        | TSLSK  | VNGQIE  | SLISPD  | G-SRKN  | PARN   | <b>CRDL</b> KF  | CHPEL    | ----KS | GEYW  | DPNQ   | <b>CKLD</b> AIKVF  | CN | MET-GET  | CISAN | 85       |   |  |
| P05997_CO5A2_HUMAN_1265-1499 | *12 | DPGVH        | ATLKSL | SSQIET  | MRSPDG  | -SKKH   | PART   | <b>CDDL</b> KL  | CHSAK    | ----QS | GEYWI | DPNQ   | <b>GSVED</b> AIKVY | CN | MET-GET  | CISAN | 87       |   |  |
| A0A084WGV4_ANOSI_1342-1565   | 1   | QKLVE        | NAYEKL | KSAFAT  | FKKPDG  | -KQG    | SPAKT  | <b>CRDL</b> FAA | HPEF     | ----TS | GNYWI | DPNE   | <b>GDARD</b> AILVY | CD | AEK-KAS  | CVLPQ | 76       |   |  |
| A0A0A1X7I7_BACCU_1333-1557   | 1   | EAMVI        | KAFEHL | KASFER  | LRRPNG  | -QQS    | APAKT  | <b>CRDL</b> FAA | YPDY     | ----KS | GEYWI | DPNE   | <b>ADPRD</b> AILVY | CD | RET-RGS  | CILPK | 76       |   |  |
| A0A087ZYL7_APIME_1278-1501   | 1   | QELIQ        | KAYKQL | KSSFQK  | FIKPDG  | -EKNS   | PAKT   | <b>CRDL</b> YS  | SAYPNK   | ----LS | GEYWI | DPNE   | <b>GDARD</b> AILVY | CD | AKK-RAT  | CLLPN | 76       |   |  |
| A0A0P6AH74_9CRUS_1341-1565   | 1   | KALVV        | KAYEQL | KVSFDKY | TKPSG   | -DKAA   | PART   | <b>CRDL</b> AVA | HPEL     | ----PS | ADYWI | DPNQ   | <b>GDTKD</b> SILVF | CD | MNR-RAT  | CIRPK | 76       |   |  |
| A0A0A1X8A9_BACCU_1680-1904   | 1   | -VDMY        | SAIYS  | MRLEMD  | MRKPTG  | -TQDN   | PVRT   | <b>CRDL</b> HYA | HQPQF    | ----EN | GWYW  | DPNA   | <b>GMDDA</b> IFVY  | CN | MSAGGET  | CIQPD | 76       |   |  |
| A0A088AKC6_APIME_1532-1755   | 1   | -LDMY        | SIYAM  | RQELDR  | IRKPIG  | -SREN   | PART   | <b>CKDL</b> FY  | GHPHF    | ----HD | GWYW  | DPNL   | <b>GMADD</b> SVYVY | CN | MNMGET   | CVYPD | 76       |   |  |
| A0A084VDT1_ANOSI_1490-1715   | 1   | -LDMY        | SIYAM  | RQELDR  | IRKPVG  | -TREN   | PART   | <b>CRDL</b> HH  | GHPQF    | ----KD | GWYW  | DPNL   | <b>GMDDA</b> VYVY  | CN | MTAEGE   | CVYPD | 76       |   |  |
| A0A0P4WM94_9CRUS_1469-1693   | 1   | -LDMY        | SIYTM  | RQDLER  | IKKPQG  | -SKEN   | PVRS   | <b>CKDL</b> YF  | GHPQF    | ----KD | GWYW  | DPNL   | <b>GMDDA</b> IYVY  | CN | MTGSGET  | CVYPD | 76       |   |  |
| P12107_COBA1_HUMAN_1576-1806 | *11 | MEEIF        | GLSL   | NSLKQD  | IEHMKF  | PMG-TQ  | TNPART | <b>CKDL</b> QL  | SHPDF    | ----PD | GEYWI | DPNQ   | <b>CSGDS</b> FKVY  | CN | FTSGGET  | CIYPD | 87       |   |  |
| P20908_CO5A1_HUMAN_1608-1838 | *14 | MEEIF        | GLSL   | NSLKLE  | IEQMKR  | PLG-TQ  | QNPART | <b>CKDL</b> QL  | CHPDF    | ----PD | GEYW  | DPNQ   | <b>CSRDS</b> FKVY  | CN | FTAGGST  | CVFPD | 90       |   |  |
| P25940_CO5A3_HUMAN_1513-1745 | *13 | LEEVL        | ASLTS  | LSLELE  | QLRRPPG | -TAER   | PGLV   | <b>CHEL</b> HRN | HPHL     | ----PD | GEYWI | DPNQ   | <b>CCARDS</b> FRVY | CN | FTAGGET  | CLYPD | 89       |   |  |
| P13942_COBA2_HUMAN_1540-1736 | *16 | LEEIF        | GLDSL  | REEIEQ  | MRRPTG  | -TQDS   | PART   | <b>QD</b> DLKL  | CHPEL    | ----PD | GEYW  | DPNQ   | <b>CCARDA</b> FRVY | CN | FTAGGET  | CVTPR | 92       |   |  |
| Q8IZC6_CORA1_HUMAN_1659-1860 | 1   | GEEIF        | KTLHYL | SNLIQS  | IKTPLG  | -TKEN   | PARV   | <b>CRDL</b> MD  | CSEQM    | ----VD | GTYW  | DPNL   | <b>GCSSDT</b> IEVY | CN | FTGGQT   | CLKPI | 77       |   |  |
| Q17RW2_COOA1_HUMAN_1514-1714 | 1   | SEEIF        | KTLN   | YLSNLL  | HSIKN   | PLG-TRD | NPARI  | <b>CKDL</b> LN  | CQKV     | ----SD | GKYW  | DPNL   | <b>GCPSDA</b> IEVY | CN | FAGGQT   | CLPPV | 77       |   |  |
| H2YGA7_CIOSA_1140-1366       | 1   | -EEIYA       | AMETL  | KQELE   | MMKPE   | MPGRTQ  | DNPGRS | <b>CKDI</b> WL  | CHPDF    | ----PS | GNYWI | DPNG   | <b>CCSADA</b> IEVY | CD | FEAEGDT  | CISPV | 77       |   |  |
| H2YJN4_CIOSA_1188-1414       | 1   | -PEMML       | VVLKEL | TSSVED  | IKAPRG  | VSRKTP  | PARS   | <b>CLDI</b> YLA | EQQQGT   | VPKS   | GVRW  | DPNG   | <b>CCNAD</b> GLEVY | CN | FHT-MET  | CVYPT | 80       |   |  |
| Cysteine positions:          |     |              |        |         |         |         |        | <b>1</b>        | <b>2</b> |        |       |        | <b>3</b>           |    | <b>4</b> |       | <b>5</b> |   |  |
| Secondary structure:         |     | -----α1----- |        |         |         | --α2--- |        | -β1-            |          | --β2-- |       | -β3-   |                    |    |          |       |          |   |  |
| Conservation:                |     | 5            | 6      | 9       | 9       | 9       | 66     | 9               | 87       | 66     | 68    | 897999 | 8                  | 95 | 9697     | 5     | 795      | 7 |  |

**Supplementary Figure 7 (in three parts). Alignments of human, arthropod and ascidian fibrillar procollagen C-termini.** Each sequence is identified by an access code for the full-length protein followed by the start and end positions of the region selected. Human sequences are indicated by collagen type (3 characters) and chain number (2 characters; e.g. CO5A2 = α2 chain of procollagen V) where COB corresponds to procollagen XI, COO to collagen XXIV and COR to collagen XXVII. Abbreviations for other species are as follows: ANOSI = *Anopheles sinensis* (insecta, mosquito); BACCU = *Bactrocera cucurbitae* (insecta, melon fly); APIME = *Apis mellifera* (insecta, honeybee); 9CRUS = *Daphnia magna* (crustacea, water flea); CIOSA = *Ciona savignyi* (ascidiacea, sea squirt). Structure-based sequence alignment was done with the programme PROMALS3D using the 3D structures of the homo-CPI chains as templates. Numbering at the top refers to the CO1A1 chain. Cysteines are highlighted (yellow) and their positions identified at the bottom as in Supplementary Fig. 2. Bold underlined characters in red (negatively charged) or blue (positively charged) show residues in CPI and CPIII involved in inter-chain salt bridge interactions. Regions of secondary structure are shown at the bottom as is the conservation score (maximum 9) for each position. For each sequence, start (left) and end (right) positions are numbered either from known or putative C-propeptide cleavage sites (\*) or from the start of the COLFI domain as defined by UniProt, which is always C-terminal to the cleavage site. Outlined in blue (in part 2) are the long and short stretches of the CRS, and in orange the 6/7 residue sequence found only in chordates.



|                              |     | 90                                                        | 100          | 110                     | 120 | 130 | 140 | 150 | 160 |  |
|------------------------------|-----|-----------------------------------------------------------|--------------|-------------------------|-----|-----|-----|-----|-----|--|
| P02452_CO1A1_HUMAN_1228-1464 | *86 | QPSVAQKNWYISKNPDKRHHVWFGESMTDGFQFEYGGCGSDPADVAIQLTFLRLMST | EASQNITYHC   | KNSVAYMDQQTGN-LKKA      | 169 |     |     |     |     |  |
| P08123_CO1A2_HUMAN_1132-1366 | *89 | PENIPAKNWYRS--SKDKKHVWLGETINAGSQFEYNVFGVTSKEMATQLAFMRLLAN | YASQNITYHC   | KNSIAYMDEETGN-LKKA      | 170 |     |     |     |     |  |
| P02458_CO2A1_HUMAN_1252-1487 | *87 | PANVPKKNWSSKSK-EKKHIWFGETINGGFHFSYGGDNLAPNTANVQMTFLRLLS   | TEGASNITYHC  | KNSIAYLDEAAGN-LKKA      | 169 |     |     |     |     |  |
| P02461_CO3A1_HUMAN_1231-1466 | *86 | PLNVPRKHWWTDSSA-EKKHVWFGESMDGGFQFSYGNFELPEDVLDVHLAFLRLLS  | SRASQNITYHC  | KNSIAYMDQASGN-VKKA      | 168 |     |     |     |     |  |
| P05997_CO5A2_HUMAN_1265-1499 | *88 | PSSVPRKTWWASKSP-DNKPVWYGLDMNRGSQFAYGDH-QSPNTAITQMTFLRLLS  | SKEASNITYI   | CKNSVGYMDDQAKN-LKKA     | 169 |     |     |     |     |  |
| A0A084WGV4_ANOSI_1342-1565   | 77  | PMRTKELHYDG-----DEQEVWLGELK-DGMKITYK-----SDSNQIGFLQLL     | SARASNITYHC  | KNTVAYFNKATNS-YRQS      | 147 |     |     |     |     |  |
| A0A0A1X7I7_BACCU_1333-1557   | 77  | PQETPNLSYNG-----AERETWLSEMP-GGMKITYK-----TDSHQLGFLQLL     | SAKATQKITFNC | RNTIGYLDADETR-NRNG      | 147 |     |     |     |     |  |
| A0A087ZYL7_APIME_1278-1501   | 77  | PVHSP EIIHIT-----DQPETWLSEIE-NGMKITYK-----ADSNQIGFLQLL    | SKNAYQNITYHC | KNSIGYFDSERKT-YRKG      | 147 |     |     |     |     |  |
| A0A0P6AH74_9CRUS_1341-1565   | 77  | PEKTKQITYLGGK----PRAEVWFSEMD-SGFQFTYK-----SDSNQMTFLQLL    | STHGSQNLT    | YHCRNSVANYDANDRS-FKKS   | 148 |     |     |     |     |  |
| A0A0A1X8A9_BACCU_1680-1904   | 77  | AHTAEAPLVPRR---QAGELDWYSRLS-GGEKITYDG-----VGTVQLTFLRLLS   | TEEAHQNF     | TYICSNSVAWYSDAERG-YSKS  | 150 |     |     |     |     |  |
| A0A088AKC6_APIME_1532-1755   | 77  | IHTTQMPNIPWR--KENNKTDWYSNLR-GGFKITYEA-----IGVVQLNFLRLLS   | QEAQNFTYT    | CINSVAWYNILNFN-YNSS     | 151 |     |     |     |     |  |
| A0A084VDT1_ANOSI_1490-1715   | 77  | IHSSQMPTIPWR--KENDKTDWYSNLR-GGFRISYET-----IGTVQMTFLRLLS   | QEAQNFTYA    | CMNSVAWYSTQDES-FDNA     | 151 |     |     |     |     |  |
| A0A0P4WM94_9CRUS_1469-1693   | 77  | LQSSKMPNIPWR-KEVGGKEEWYSNMR-GASKVTYET-----VGVVQMTFLRLLS   | SQKAHQNF     | TFTCVNSAAWYNQRTFN-YDQA  | 152 |     |     |     |     |  |
| P12107_COBA1_HUMAN_1576-1806 | *88 | KKSEGVRISWP---KEKPGSWFSEFK-RGKLLSYLDV-EGNSINMVQMTFLKLLT   | SARQNFTYHC   | CHQSAAWYDVSSGS-YDKA     | 166 |     |     |     |     |  |
| P20908_CO5A1_HUMAN_1608-1838 | *91 | KKSEGARITSWP---KENPGSWFSEFK-RGKLLSYVDA-EGNPVGVVQMTFLRLLS  | SASAHQNV     | TYHCYQSVAWQDAATGS-YDKA  | 169 |     |     |     |     |  |
| P25940_CO5A3_HUMAN_1513-1745 | *90 | KKFEIVKLASWS---KEKPGGWYSTFR-RGKKFSYVDA-DGSPVNVVQLNFLKLL   | SATARQNFT    | YSCQNAAAWLDEATGD-YSHS   | 168 |     |     |     |     |  |
| P13942_COBA2_HUMAN_1540-1736 | *93 | DDVT-----QFSYVDS-EGSPVGVVQLTFLRLLS                        | VSAHQDVS     | YPCSGAAR-----DGP        | 139 |     |     |     |     |  |
| Q8IZC6_CORA1_HUMAN_1659-1860 | 78  | TAS-----KVEFA-----ISRVQMNFLHLLS                           | SSEVTQH      | ITIHCLNMTVWQEGTGQTPAKQA | 127 |     |     |     |     |  |
| Q17RW2_COOA1_HUMAN_1514-1714 | 78  | SVT-----KLEFG-----VGKVQMNFLHLLS                           | SSEATHI      | ITIHCLNTPRWTSTQTSG-PGLP | 126 |     |     |     |     |  |
| H2YGA7_CIOSA_1140-1366       | 78  | ERTASVSWLTSKRWPKAQPGDWFSYR-MGDRFEYN-----TSIPQFNFLRLLS     | SQAKQRFTY    | KCVNSIGWENQQTGS-FDQA    | 153 |     |     |     |     |  |
| H2YJN4_CIOSA_1188-1414       | 81  | NRNIENGTHYTG----EPGHTYYGEEMTRVEHA-----DYASQLTFLRLLS       | SKAKQQTFF    | CRNMVAYYDASADN-KAQA     | 150 |     |     |     |     |  |

Cysteine positions:

Secondary structure:

Conservation:

--β4--

-α3-

-----α4-----

----β5----

857 6 7 8 98 986 6 8 86 9 6 6

6

**Supplementary Figure 7 (continued).**

|                              | 170  | 180                                           | 190                 | 200                      | 210                              | 220              | 230         | 240         |               |             |     |     |
|------------------------------|------|-----------------------------------------------|---------------------|--------------------------|----------------------------------|------------------|-------------|-------------|---------------|-------------|-----|-----|
| P02452_CO1A1_HUMAN_1228-1464 | *170 | LLLQGSNEIEIRAEGNSRFTYSVTVDG                   | CT                  | TSHTGAWGKTVIEYKTTKTSRLPI | IDVAPLDVVGAPDQEF                 | FGFDVGPVC        | FL-         | 246         |               |             |     |     |
| P08123_CO1A2_HUMAN_1132-1366 | *171 | VILQGSNDVELVAEGNSRFTYTVLVDG                   | CS                  | SKKTNEWGKTIIEYKTNKPSRLP  | PFLDIAPLDIGGADQEFF               | VDIGPVC          | FK-         | 247         |               |             |     |     |
| P02458_CO2A1_HUMAN_1252-1487 | *170 | LLIQGSNDVEIRAEGNSRFTYTALKDG                   | CT                  | KHTGKWKTVIEYRSQKTSRLPI   | IDIAPMDIGGPEQEF                  | GVDIGPVC         | FL-         | 246         |               |             |     |     |
| P02461_CO3A1_HUMAN_1231-1466 | *169 | LKLMGSN <del>E</del> GEFKAEGNS <del>K</del> F | FTY                 | TVLEDGCTKHTGEWSKTVFEYRT  | <del>R</del> KAV <del>L</del> LP | IVDIAPYDIGGPDQEF | GVVGPVC     | FL-         |               |             |     |     |
| P05997_CO5A2_HUMAN_1265-1499 | *170 | VVLKGANDLDIKAEGNIRFRYIVLQDT                   | CS                  | KRNGNVGKTVFEYRTQNVARLP   | IIDLAPVDVGGTDQEF                 | GVEIGPVC         | FV-         | 235         |               |             |     |     |
| A0A084WGV4_ANOSI_1342-1565   | 148  | VKLLAWNDAELTARGPQRLRYEALQDDC                  | QH                  | RTAHYAQSVLSYSTDKPMRLPI   | IDIAVRDVGESNQQF                  | FWVEIGAVCFH-     | 224         |             |               |             |     |     |
| A0A0A1X7I7_BACCU_1333-1557   | 148  | LKLLSWNDAELTPKGPMLRYVAESDEC                   | CR                  | HRSNAWAKTVITYKTEKPQRLP   | IVDVKIRDVGEANQQF                 | FRIELGPVCFYT     | 225         |             |               |             |     |     |
| A0A087ZYL7_APIME_1278-1501   | 148  | MKFLTWNDAELTPRGNQRLRYEMI                      | IDE                 | CRTHNGKWKTIISYQTDKTI     | RLPIIDVALRDIGKPNQ                | SFYIEIGNVCYE-    | 224         |             |               |             |     |     |
| A0A0P6AH74_9CRUS_1341-1565   | 149  | MKILGWNDIELNAMGKRRFKYEVI                      | ED                  | CKSRADTWAKSVITFETDKPNR   | LPFVDVGI'FDIGE                   | PNQQFSLEIGMACFW- | 225         |             |               |             |     |     |
| A0A0A1X8A9_BACCU_1680-1904   | 151  | LRLLGEMEI                                     | ANEGT-DIKPEVLRDE    | CQQPN-QRGETVLLV          | TRKHNYLPLVDFY                    | PQDYARTDQAF      | GFKVGPACFK- | 225         |               |             |     |     |
| A0A088AKC6_APIME_1532-1755   | 152  | IRLLGANED                                     | EF                  | SYTG---IKPQIVMDN         | CKTRK-NKGETVLLIQ                 | SKKLQQLPLVDFY    | PIDYGLPHQAF | GFTVGPICFK- | 224           |             |     |     |
| A0A084VDT1_ANOSI_1490-1715   | 152  | LRFLGENE                                      | IDIGYEQSK-IKPTVLVDG | CKTGR-SKSETVFE           | IRTPKLQYLP                       | IIDFY            | PVDYGLPQQAF | GFGVGPVCFK- | 226           |             |     |     |
| A0A0P4WM94_9CRUS_1469-1693   | 153  | IKLLGDNE                                      | QEF                 | SAKG---VRPNVILDG         | CKNRK-GSSKTVFE                   | IRSDKLGQLP       | IIDFFPVDY   | GQPHQAF     | GFEVGPVCFK-   | 225         |     |     |
| P12107_COBA1_HUMAN_1576-1806 | *167 | LRFLGSNDE                                     | E                   | MSYDNN--PFIKTLYDG        | CASRK-GYEKTVIE                   | INTPKIDQVP       | IVDVMIND    | FGDQNK      | FGFEVGPVCF    | LG          | 241 |     |
| P20908_CO5A1_HUMAN_1608-1838 | *170 | LRFLGSNDE                                     | E                   | MSYDNN--PYIRALVDG        | CATKK-GYQKTVLE                   | IDTPKVEQVP       | IVDIMFN     | DFGEASQ     | KFGFEVGPAC    | FMG         | 244 |     |
| P25940_CO5A3_HUMAN_1513-1745 | *169 | ARFLGTN                                       | GEELS               | SNQTTAATVSV              | PQDGCRLRK-GQTKL                  | FEFSSSRAGFL      | PLWDVAAT    | DFGQTN      | KFGFELGPVCF   | SS          | 245 |     |
| P13942_COBA2_HUMAN_1540-1736 | *140 | LRLRGANE                                      | DEL                 | SPETS--PYVKEFRDGC        | QT---QQGRTV                      | LEV              | TPVLEQLPVLD | ASFSDLGAP   | PRRGGVLLGPVCF | FMG         | 212 |     |
| Q8IZC6_CORA1_HUMAN_1659-1860 | 128  | VRFRAWNGQ                                     | I                   | FEAGGQ--FRPEVSM          | DGCKVQDGRWHQ                     | TLFTFRTQDP       | QQLP        | II          | SVDNLPPASSG   | KQYRLEVGPAC | FL- | 202 |
| Q17RW2_COOA1_HUMAN_1514-1714 | 127  | IGFKGWNGQ                                     | I                   | FKVNTL--LEPKVLS          | DDCKIQDGSWHK                     | ATFLFHTQEP       | NQLPVIEV    | QKLP        | PHLKTERKYY    | IDSSSVC     | FL- | 201 |
| H2YGA7_CIOSA_1140-1366       | 154  | IHLLAANDE                                     | V                   | LTYS---EHLTVIED          | NCKTGH-GNGQV                     | VLELRTREVD       | LLPLFDY     | KAFDFG      | TRSQRHGYQL    | DRVCF       | SG  | 227 |
| H2YJN4_CIOSA_1188-1414       | 151  | LKLRGFGDAE                                    | F                   | TAEGAVGTTYRVL            | HDGCSRPTQWDR                     | TEIEFETRLV       | GRMPI       | ITDIAPFD    | IGDADQQ       | FGAKFGPVC   | FK- | 227 |

Cysteine positions: 7 8

Secondary structure: -β6- -β7- --β8- -----β9----- -β10- --β11- -β12-

Conservation: 5 5 85 5 9 9 5 5 7 69 6 7 6 6 5 6 698

Supplementary Figure 7 (end).

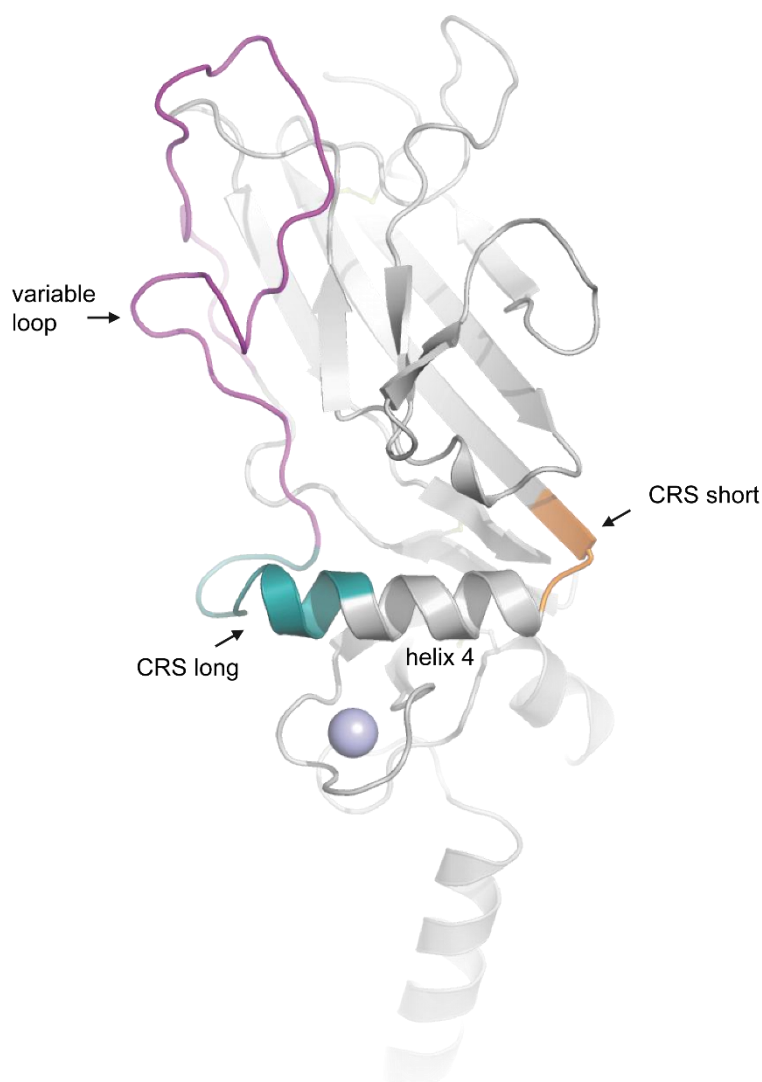

**Supplementary Figure 8. Chain recognition sequence and variable loop.** Shown is one of the chains from homo-CPI (in grey, bound  $\text{Ca}^{2+}$  in light blue) with the long and short stretches of the CRS marked in deep teal (blueish green) and light orange, respectively. The relatively poorly conserved ~30 residue sequence that precedes the CRS long (see Supplementary Fig. 5), shown in magenta, is part of a surface-exposed loop in the petal region that is not involved in inter-chain interactions. See also Supplementary Movie 5.
